# Supplementary material for: Trap-induced photoresponse of solution-synthesized MoS2
Source: Royal Society of Chemistry journal article supplement (doi:10.1039/c6nr00654j), 2016-01-01
Supplement: c6nr00654j1.pdf [file c6nr00654j1.pdf]

Supporting Information for

## Trap-induced Photoresponse of Solution-Synthesized MoS<sub>2</sub>

Youngbin Lee<sup>1†</sup>, Jaehyun Yang<sup>2†</sup>, Dain Lee<sup>1</sup>, Yong-Hoon Kim<sup>1,2</sup>, Jin-Hong Park,<sup>3</sup> Hyungsub Kim<sup>2\*</sup> and Jeong Ho Cho<sup>1,4\*</sup>

<sup>1</sup>SKKU Advanced Institute of Nanotechnology (SAINT), <sup>2</sup>School of Advanced Materials Science and Engineering, <sup>3</sup>School of Electronics and Electrical Engineering, <sup>4</sup>School of Chemical Engineering, Sungkyunkwan University, Suwon 440-746, Korea.

<sup>†</sup>These authors equally contributed to this work.

\*Corresponding authors: [jhcho94@skku.edu](mailto:jhcho94@skku.edu) and [hsubkim@skku.edu](mailto:hsubkim@skku.edu)

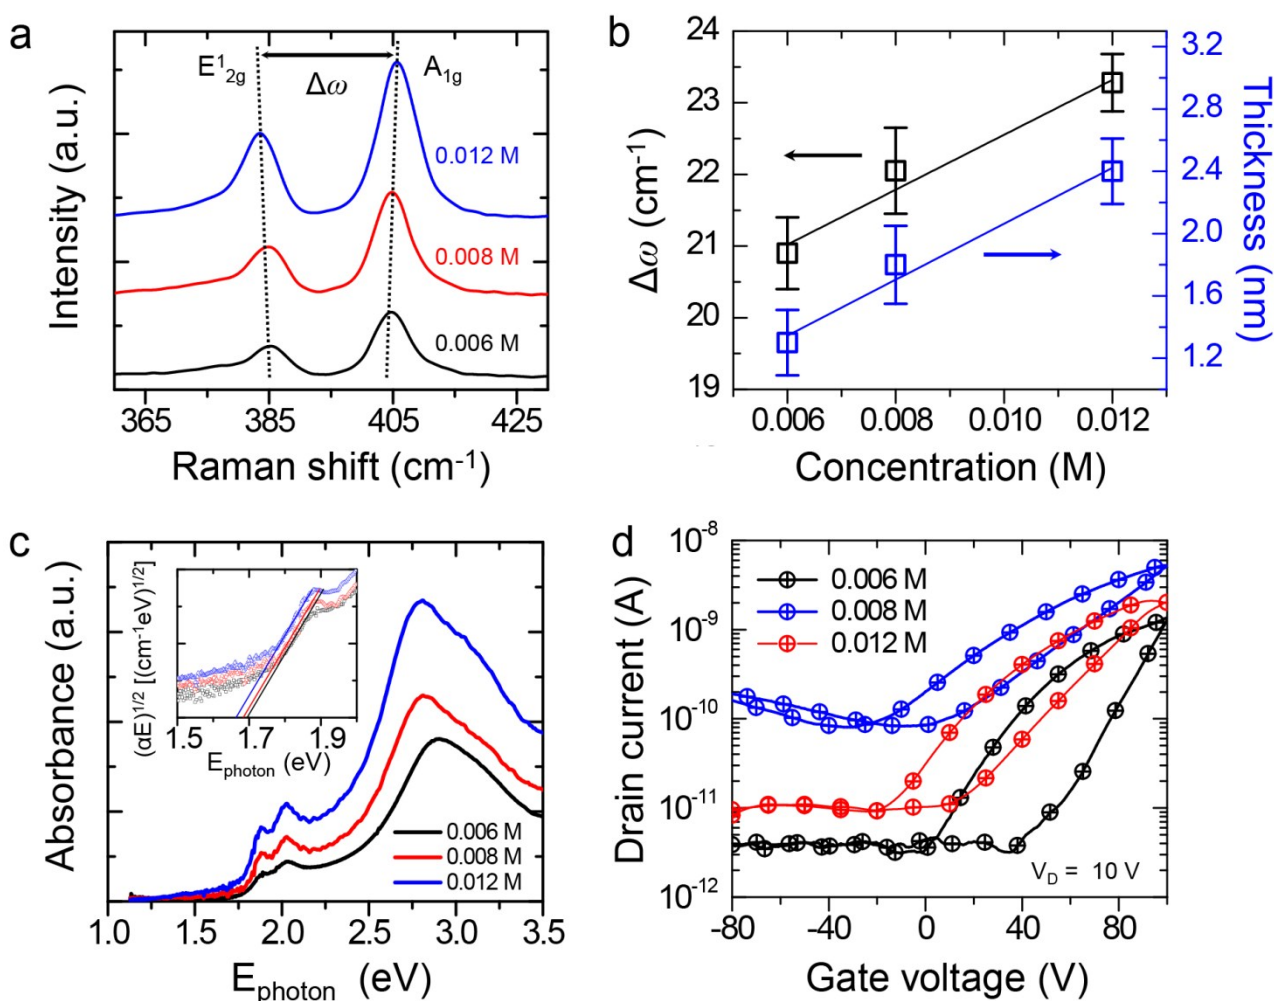

**Figure S1.** (a) Raman spectra of solution-synthesized MoS<sub>2</sub> films with different precursor concentrations. (b) Relative peak position difference ( $\Delta\omega$ ) between two major Raman modes and AFM thickness of solution-synthesized MoS<sub>2</sub> films as a function of precursor concentrations. (c) UV-Vis absorption spectroscopy of solution-synthesized MoS<sub>2</sub> films with different precursor concentrations. (d) Transfer characteristics of solution-synthesized MoS<sub>2</sub> phototransistor with respect to different channel thickness at a fixed drain voltage of 10 V.

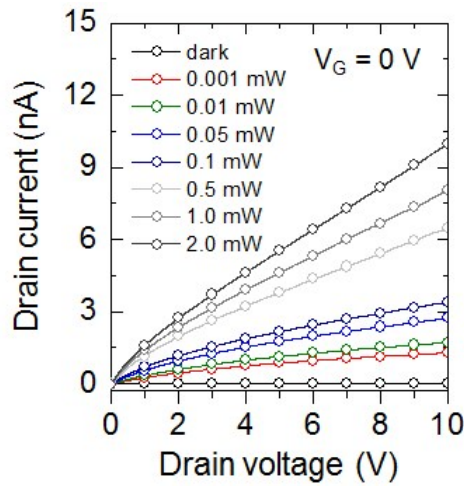

**Figure S2.** Output characteristics of the solution-synthesized MoS<sub>2</sub> phototransistors as a function of illumination power at a fixed incident illumination wavelength of 520 nm.

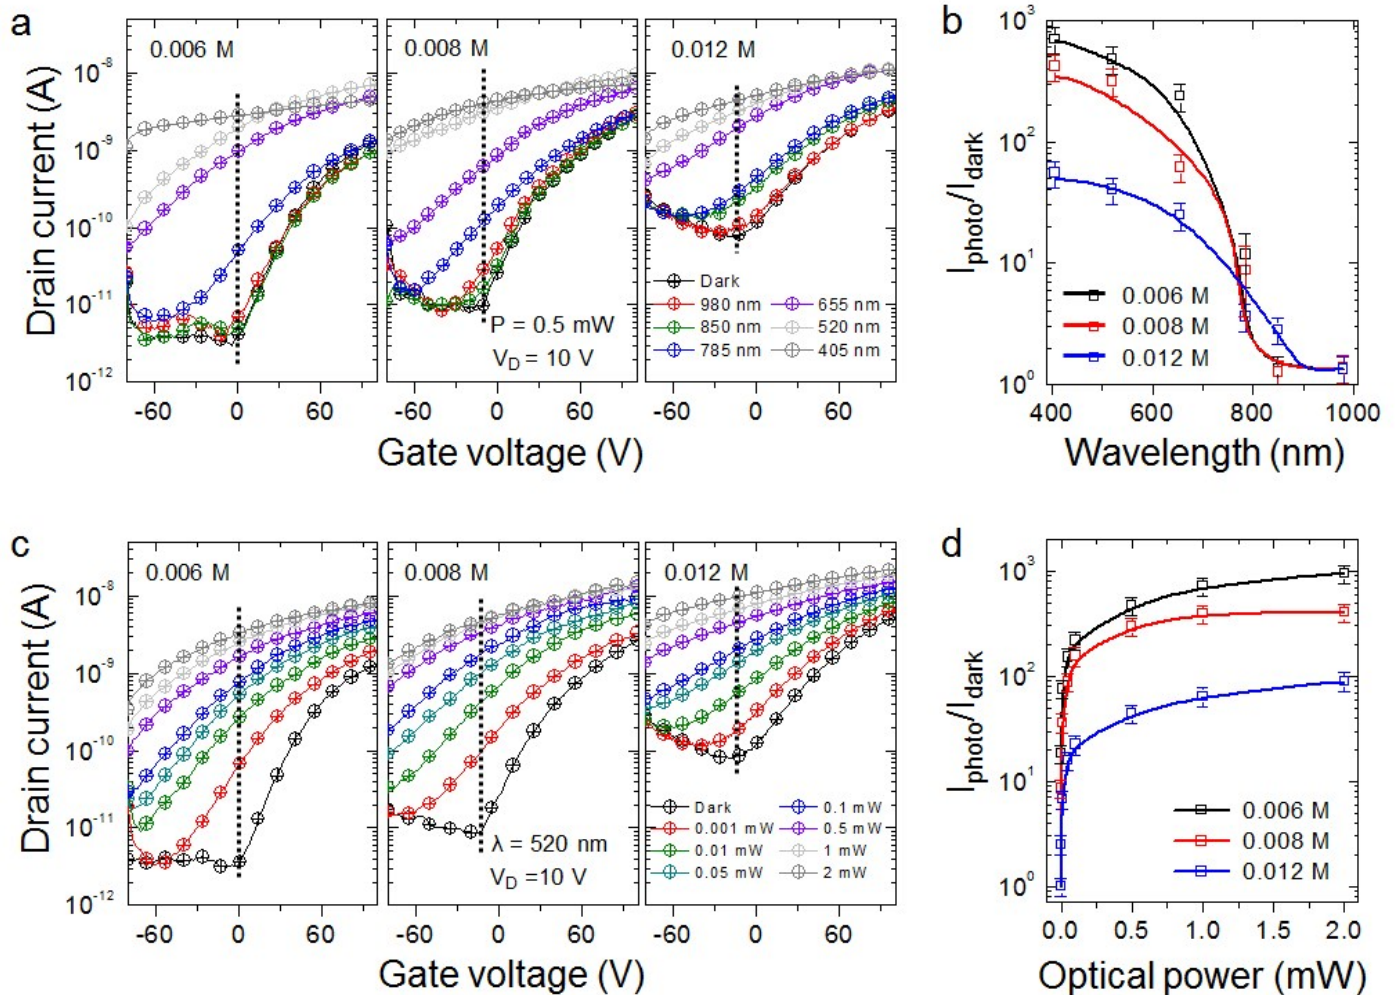

**Figure S3.** (a) MoS<sub>2</sub> channel thickness dependent transfer characteristics ( $V_D = 10$  V) of the phototransistors under different illumination wavelengths at a fixed incident illumination power of 0.5 mW. (b) Photo-induced on/off ratio at  $V_G = 0$  V of the phototransistors with different MoS<sub>2</sub> channel thickness as a function of the illuminated wavelength. (c) MoS<sub>2</sub> channel thickness dependent transfer characteristics ( $V_D = 10$  V) of the phototransistors under different illumination powers at a fixed wavelength of 520 nm. (d) Photo-induced on/off ratio (at  $V_D = 0$  V) of the phototransistors as a function of the illumination power.
